# Supplementary material for: Risk of thromboembolism in cisplatin versus carboplatin-treated patients with lung cancer
Source: PubMed Central journal article supplement (PMC5724847; doi:10.1371/journal.pone.0189410), 2017-12-11
Supplement: pone.0189410.s001.pdf [file pone.0189410.s001.pdf]

| Cisplatin vs Carboplatin | Gender | Age | Ethnicity | Diagnosis      | Stage | Smoking | ECOG PS | Creatinine | GFR | WBC  | HgB  | PLT | BMI  | Thromboembolic Events (Yes=1 or No=0) |
|--------------------------|--------|-----|-----------|----------------|-------|---------|---------|------------|-----|------|------|-----|------|---------------------------------------|
| carboplatin              | F      | 63  | AA        | other          | IV    | Former  | 1       | 1.45       | 44  | 6.7  | 9.2  | 179 | 26.0 | 0                                     |
| carboplatin              | F      | 56  | Caucasian | adenocarcinoma | IV    | Never   | 0       | 0.59       | 103 | 6    | 12.5 | 302 | 23.0 | 0                                     |
| cisplatin                | M      | 49  | Caucasian | other          | IV    | Current | 0       | 1.11       | 77  | 7.6  | 13.4 | 535 | 26.0 | 0                                     |
| carboplatin              | F      | 72  | Caucasian | SCLC           | IV    | Current | 1       | 1.4        | 37  | 2.6  | 10.5 | 339 | 19.5 | 0                                     |
| carboplatin              | F      | 62  | Caucasian | SCLC           | IV    | Former  | 1       | 0.83       | 76  | 13.2 | 11.7 | 268 | 29.0 | 0                                     |
| carboplatin              | F      | 60  | Caucasian | adenocarcinoma | IV    | Never   | 1       | 0.63       | 98  | 4.2  | 10.5 | 155 | 29.0 | 1                                     |
| carboplatin              | M      | 72  | Caucasian | Squamous       | IV    | Former  | 2       | 1.79       | 37  | 8.2  | 11.7 | 233 | 27.0 | 0                                     |
| carboplatin              | F      | 70  | AA        | other          | III   | Former  | 1       | 0.93       | 72  | 6.8  | 12   | 269 | 19.3 | 0                                     |
| carboplatin              | F      | 70  | Caucasian | SCLC           | IV    | Current | 1       | 1.03       | 55  | 9.2  | 12.2 | 353 | 27.2 | 0                                     |
| carboplatin              | F      | 64  | Caucasian | SCLC           | IV    | Current | 2       | 0.68       | 106 | 8.8  | 15.3 | 224 | 32.9 | 1                                     |
| cisplatin                | F      | 71  | Caucasian | Squamous       | III   | Former  | 0       | 0.81       | 73  | 6.1  | 11.6 | 287 | 29.0 | 0                                     |
| cisplatin                | M      | 51  | Caucasian | Squamous       | III   | Current | 1       | 0.94       | 93  | 14.6 | 12.9 | 348 | 32.9 | 1                                     |
| carboplatin              | F      | 57  | Caucasian | adenocarcinoma | III   | Former  | 1       | 0.61       | 100 | 12.3 | 12.4 | 238 | 27.1 | 0                                     |
| cisplatin                | M      | 73  | AA        | SCLC           | IV    | Current | 1       | 1.1        | 77  | 6.3  | 10.7 | 208 | 22.9 | 0                                     |
| carboplatin              | M      | 66  | Caucasian | adenocarcinoma | IV    | Current | 1       | 1.3        | 56  | 6.5  | 14.9 | 281 | 28.9 | 0                                     |
| carboplatin              | F      | 79  | Caucasian | other          | IV    | Former  | 1       | 0.85       | 65  | 8.9  | 9.7  | 558 | 30.3 | 0                                     |
| cisplatin                | F      | 59  | Caucasian | Squamous       | III   | Current | 1       | 0.92       | 68  | 8.7  | 13.8 | 287 | 28.2 | 0                                     |
| carboplatin              | M      | 69  | Caucasian | squamous       | III   | former  | 0       | 0.83       | 90  | 10.7 | 11.3 | 394 | 29.5 | 0                                     |
| carboplatin              | F      | 71  | Caucasian | SCLC           | IV    | Current | 0       | 0.55       | 95  | 6.5  | 11.5 | 292 | 21.3 | 0                                     |
| carboplatin              | F      | 72  | Caucasian | Squamous       | III   | Former  | 1       | 0.94       | 58  | 5.8  | 12.2 | 275 | 28.8 | 0                                     |
| carboplatin              | F      | 80  | Caucasian | SCLC           | IV    | Former  | 2       | 0.7        | 82  | 6.4  | 13.8 | 331 | 17.9 | 0                                     |
| cisplatin                | M      | 51  | Caucasian | SCLC           | IV    | Current | 1       | 0.81       | 101 | 9.7  | 12.5 | 337 | 29.3 | 0                                     |
| cisplatin                | F      | 61  | Caucasian | adenocarcinoma | III   | Never   | 0       | 0.78       | 82  | 19.5 | 12.1 | 422 | 27.4 | 0                                     |
| cisplatin                | M      | 55  | Caucasian | SCLC           | IV    | Current | 1       | 0.71       | 105 | 5.6  | 11.2 | 322 | 24.5 | 1                                     |
| carboplatin              | F      | 47  | Caucasian | SCLC           | I     | Current | 1       | 0.7        | 103 | 6.9  | 14.2 | 339 | 23.6 | 0                                     |
| carboplatin              | F      | 64  | Caucasian | adenocarcinoma | IV    | Former  | 0       | 0.85       | 72  | 5.7  | 13.7 | 275 | 29.7 | 1                                     |
| carboplatin              | F      | 71  | Caucasian | SCLC           | IV    | Never   | 1       | 0.75       | 80  | 9.2  | 16.1 | 226 | 22.1 | 1                                     |
| carboplatin              | M      | 81  | Caucasian | squamous       | III   | former  | 1       | 1.06       | 65  | 5.9  | 13.7 | 179 | 29.3 | 0                                     |
| carboplatin              | M      | 65  | Caucasian | other          | IV    | Former  | 1       | 0.85       | 91  | 10.1 | 13.1 | 324 | 33.8 | 0                                     |
| carboplatin              | M      | 61  | Caucasian | adenocarcinoma | IV    | Current | 3       | 1.06       | 75  | 5.5  | 10.4 | 245 | 26.1 | 0                                     |
| carboplatin              | M      | 54  | Caucasian | adenocarcinoma | III   | Current | 1       | 0.8        | 101 | 10.4 | 11   | 347 | 20.5 | 0                                     |
| carboplatin              | F      | 66  | Caucasian | other          | III   | Former  | 1       | 0.99       | 56  | 5.5  | 11.9 | 251 | 27.1 | 1                                     |
| carboplatin              | M      | 75  | Caucasian | adenocarcinoma | IV    | Former  | 1       | 1.09       | 66  | 5.8  | 11.2 | 298 | 26.9 | 0                                     |
| carboplatin              | M      | 47  | Caucasian | adenocarcinoma | IV    | current | 1       | 1.03       | 86  | 11.9 | 16.2 | 162 | 28.7 | 0                                     |
| cisplatin                | M      | 65  | Caucasian | SCLC           | IV    | Current | 2       | 0.63       | 103 | 6.5  | 8.8  | 246 | 23.4 | 0                                     |
| carboplatin              | M      | 64  | Caucasian | adenocarcinoma | IV    | Current | 1       | 0.71       | 90  | 11.8 | 10.7 | 424 | 19.2 | 1                                     |
| carboplatin              | M      | 79  | Caucasian | adenocarcinoma | IV    | Never   | 1       | 0.86       | 82  | 12.4 | 13   | 440 | 28.8 | 0                                     |
| carboplatin              | M      | 58  | other     | adenocarcinoma | IV    | Never   | 2       | 0.63       | 109 | 12.4 | 13   | 565 | 22.7 | 1                                     |
| carboplatin              | F      | 67  | Caucasian | Squamous       | II    | Former  | 1       | 0.67       | 92  | 5.4  | 12   | 347 | 26.9 | 0                                     |
| carboplatin              | F      | 64  | Caucasian | adenocarcinoma | IV    | Former  | 1       | 0.69       | 92  | 8.1  | 12.8 | 320 | 27.8 | 0                                     |
| cisplatin                | F      | 54  | Caucasian | adenocarcinoma | III   | Never   | 0       | 0.92       | 71  | 5.5  | 14.3 | 327 | 19.0 | 0                                     |
| carboplatin              | F      | 63  | Caucasian | adenocarcinoma | IV    | Former  | 1       | 0.71       | 91  | 11.3 | 12.3 | 255 | 31.3 | 0                                     |
| carboplatin              | F      | 56  | Caucasian | adenocarcinoma | IV    | Current | 1       | 1          | 63  | 8.3  | 11.6 | 391 | 17.0 | 0                                     |
| carboplatin              | F      | 75  | Caucasian | adenocarcinoma | II    | Current | 1       | 0.68       | 86  | 7.4  | 9.3  | 199 | 29.4 | 0                                     |
| carboplatin              | F      | 68  | Caucasian | SCLC           | IV    | Current | 2       | 0.45       | 103 | 8.8  | 10.3 | 390 | 23.4 | 0                                     |
| carboplatin              | F      | 64  | Caucasian | Squamous       | IV    | Former  | 1       | 0.86       | 71  | 18.9 | 13.7 | 374 | 29.6 | 0                                     |
| carboplatin              | F      | 73  | Caucasian | SCLC           | III   | Current | 2       | 0.71       | 85  | 8.2  | 11.9 | 295 | 18.5 | 0                                     |
| carboplatin              | F      | 52  | Caucasian | SCLC           | III   | Current | 1       | 0.56       | 107 | 7.9  | 9.3  | 265 | 28.8 | 0                                     |
| carboplatin              | F      | 86  | Caucasian | adenocarcinoma | IV    | Former  | 2       | 1.46       | 32  | 10.8 | 11.5 | 192 | 22.7 | 0                                     |
| carboplatin              | F      | 43  | Caucasian | adenocarcinoma | IV    | Never   | 1       | 0.47       | 121 | 5.1  | 12.5 | 196 | 20.5 | 0                                     |
| carboplatin              | M      | 62  | Caucasian | other          | IV    | Former  | 2       | 0.74       | 98  | 10.5 | 14.8 | 202 | 40.1 | 1                                     |
| carboplatin              | M      | 64  | Caucasian | other          | IV    | Current | 1       | 1.07       | 73  | 17.4 | 15.2 | 246 | 32.8 | 1                                     |
| carboplatin              | F      | 56  | Caucasian | other          | IV    | Current | 0       | 0.61       | 102 | 7.8  | 13.6 | 200 | 31.6 | 0                                     |
| cisplatin                | F      | 66  | Caucasian | Squamous       | II    | Former  | 1       | 0.65       | 92  | 9.9  | 13.9 | 285 | 32.3 | 0                                     |
| carboplatin              | F      | 62  | Caucasian | adenocarcinoma | IV    | Current | 1       | 0.42       | 110 | 13.3 | 14.1 | 181 | 23.6 | 0                                     |
| cisplatin                | F      | 69  | Caucasian | SCLC           | I     | Current | 1       | 0.57       | 95  | 4.7  | 11.2 | 335 | 19.6 | 0                                     |
| carboplatin              | M      | 64  | Caucasian | other          | IV    | Former  | 3       | 1.27       | 59  | 8.7  | 14.2 | 263 | 33.0 | 0                                     |
| carboplatin              | M      | 71  | other     | adenocarcinoma | IV    | Never   | 1       | 0.82       | 89  | 9    | 14.4 | 311 | 22.5 | 0                                     |
| carboplatin              | M      | 61  | AA        | SCLC           | IV    | Current | 1       | 1.37       | 63  | 5.9  | 14.2 | 205 | 29.7 | 0                                     |
| carboplatin              | F      | 56  | Caucasian | SCLC           | IV    | Current | 0       | 0.66       | 98  | 7.9  | 15.5 | 236 | 26.7 | 0                                     |
| carboplatin              | F      | 69  | Caucasian | adenocarcinoma | IV    | Former  | 1       | 0.77       | 78  | 7.7  | 12   | 359 | 24.2 | 0                                     |
| carboplatin              | F      | 69  | Caucasian | SCLC           | IV    | Current | 2       | 0.85       | 70  | 17.4 | 8    | 170 | 38.3 | 0                                     |
| carboplatin              | F      | 44  | Caucasian | other          | III   | Current | 1       | 0.65       | 105 | 10.4 | 13.5 | 179 | 25.1 | 0                                     |
| cisplatin                | M      | 56  | Caucasian | Squamous       | III   | Current | 2       | 0.65       | 108 | 6.8  | 12.6 | 385 | 32.1 | 0                                     |
| carboplatin              | M      | 66  | Caucasian | Squamous       | II    | Former  | 1       | 0.8        | 93  | 8.4  | 13.2 | 230 | 24.9 | 0                                     |
| carboplatin              | F      | 69  | Caucasian | Squamous       | III   | Current | 1       | 0.57       | 94  | 10.6 | 14.5 | 396 | 23.4 | 0                                     |
| carboplatin              | F      | 70  | Caucasian | other          | IV    | Current | 1       | 1.1        | 49  | 8.4  | 13   | 255 | 30.8 | 1                                     |
| carboplatin              | M      | 54  | Caucasian | SCLC           | IV    | Former  | 0       | 0.9        | 96  | 9.2  | 14   | 377 | 28.5 | 0                                     |
| carboplatin              | M      | 48  | AA        | adenocarcinoma | II    | Current | 2       | 0.75       | 125 | 13.8 | 13.3 | 172 | 23.9 | 0                                     |
| carboplatin              | F      | 69  | Caucasian | adenocarcinoma | IV    | Former  | 1       | 1.07       | 51  | 5.6  | 13.3 | 163 | 34.0 | 0                                     |
| carboplatin              | m      | 66  | Caucasian | adenocarcinoma | IV    | Current | 1       | 0.78       | 94  | 12.6 | 12.2 | 258 | 27.1 | 0                                     |
| carboplatin              | M      | 65  | Caucasian | Squamous       | IV    | Current | 1       | 0.86       | 92  | 11.2 | 12.2 | 354 | 19.2 | 0                                     |
| carboplatin              | M      | 64  | Caucasian | adenocarcinoma | IV    | Current | 3       | 0.97       | 82  | 8.6  | 17.4 | 178 | 25.6 | 0                                     |

|             |   |    |           |                |     |         |   |      |     |      |      |     |      |   |
|-------------|---|----|-----------|----------------|-----|---------|---|------|-----|------|------|-----|------|---|
| carboplatin | F | 50 | Caucasian | Squamous       | III | Current | 1 | 0.63 | 104 | 7.5  | 12.9 | 280 | 30.5 | 1 |
| cisplatin   | M | 57 | AA        | adenocarcinoma | IV  | Former  | 1 | 0.66 | 123 | 11.2 | 9.7  | 582 | 24.8 | 0 |
| carboplatin | M | 60 | AA        | Squamous       | IV  | Current | 2 | 0.88 | 104 | 9.7  | 11.9 | 354 | 24.7 | 0 |
| cisplatin   | M | 41 | Caucasian | adenocarcinoma | III | Current | 1 | 0.68 | 119 | 12.3 | 9.6  | 590 | 20.8 | 1 |
| cisplatin   | F | 59 | Caucasian | adenocarcinoma | III | Former  | 0 | 0.85 | 75  | 6.4  | 13.5 | 276 | 27.7 | 0 |
| cisplatin   | F | 47 | Caucasian | adenocarcinoma | IV  | Current | 0 | 0.5  | 115 | 9.1  | 12.8 | 391 | 27.1 | 0 |
| cisplatin   | M | 73 | Caucasian | SCLC           | IV  | Current | 2 | 0.51 | 106 | 9.8  | 11.9 | 441 | 22.9 | 0 |
| carboplatin | M | 62 | AA        | Squamous       | IV  | Current | 0 | 1.93 | 42  | 3.9  | 7.7  | 135 | 36.5 | 0 |
| carboplatin | M | 80 | Caucasian | adenocarcinoma | III | Former  | 2 | 1.04 | 67  | 8.1  | 12   | 141 | 19.5 | 0 |
| cisplatin   | F | 65 | Caucasian | adenocarcinoma | IV  | Current | 1 | 0.77 | 81  | 6    | 12.7 | 310 | 16.0 | 0 |
| carboplatin | M | 55 | Caucasian | adenocarcinoma | IV  | Current | 0 | 0.71 | 106 | 12.7 | 10.6 | 365 | 20.0 | 0 |
| cisplatin   | M | 70 | Caucasian | Squamous       | III | Former  | 1 | 0.96 | 79  | 5    | 12.1 | 174 | 36.7 | 0 |
| carboplatin | M | 72 | Caucasian | other          | III | Current | 1 | 0.79 | 90  | 11.2 | 11.1 | 303 | 17.8 | 0 |
| carboplatin | F | 48 | Caucasian | adenocarcinoma | IV  | Never   | 1 | 0.67 | 104 | 11.8 | 10.7 | 207 | 28.6 | 1 |
| carboplatin | M | 70 | AA        | Squamous       | III | Former  | 1 | 0.61 | 117 | 5.1  | 13   | 182 | 23.2 | 0 |
| carboplatin | M | 74 | Caucasian | Squamous       | III | Former  | 0 | 0.9  | 84  | 9.1  | 14.1 | 258 | 28.7 | 0 |
| carboplatin | M | 73 | Caucasian | adenocarcinoma | IV  | Former  | 1 | 0.65 | 97  | 6.5  | 13.9 | 248 | 25.1 | 0 |
| carboplatin | F | 64 | Caucasian | Squamous       | II  | Current | 1 | 1.06 | 55  | 8.9  | 13.1 | 229 | 23.3 | 0 |
| carboplatin | F | 71 | Caucasian | Squamous       | II  | Former  | 0 | 0.7  | 50  | 4.3  | 11   | 208 | 24.5 | 0 |
| carboplatin | M | 69 | Caucasian | SCLC           | IV  | Current | 2 | 1.11 | 67  | 12.7 | 15.4 | 283 | 27.3 | 0 |
| carboplatin | M | 72 | Caucasian | Squamous       | III | Current | 1 | 0.98 | 77  | 10.3 | 10.4 | 352 | 22.0 | 0 |
| carboplatin | M | 83 | Caucasian | other          | IV  | Current | 0 | 0.79 | 83  | 10.7 | 15   | 203 | 18.8 | 0 |
| carboplatin | F | 72 | Caucasian | adenocarcinoma | II  | Never   | 0 | 0.67 | 88  | 7.5  | 14.8 | 222 | 27.6 | 0 |
| cisplatin   | F | 51 | Caucasian | SCLC           | IV  | Former  | 3 | 0.68 | 102 | 20.9 | 13.9 | 184 | 35.2 | 0 |
| carboplatin | F | 80 | Caucasian | SCLC           | IV  | Current | 3 | 0.63 | 79  | 13.4 | 13.1 | 210 | 17.6 | 0 |
| cisplatin   | M | 57 | Caucasian | adenocarcinoma | III | Current | 0 | 0.5  | 120 | 5.5  | 14.8 | 248 | 15.7 | 0 |
| carboplatin | M | 60 | AA        | other          | IV  | Current | 1 | 0.51 | 134 | 17.6 | 9.6  | 270 | 21.2 | 1 |
| carboplatin | F | 68 | Caucasian | SCLC           | IV  | Former  | 1 | 0.9  | 66  | 7.2  | 10.7 | 306 | 24.9 | 0 |
| cisplatin   | M | 66 | Caucasian | SCLC           | IV  | Former  | 0 | 0.75 | 95  | 9.2  | 12.5 | 184 | 28.1 | 0 |
| cisplatin   | F | 63 | Caucasian | adenocarcinoma | IV  | Former  | 1 | 0.74 | 86  | 10.6 | 11   | 350 | 33.5 | 1 |
| carboplatin | F | 72 | Caucasian | SCLC           | IV  | Former  | 1 | 0.83 | 71  | 17.2 | 15.1 | 262 | 28.9 | 1 |
| carboplatin | M | 82 | Caucasian | adenocarcinoma | IV  | Former  | 1 | 1    | 70  | 11.2 | 10   | 412 | 26.3 | 0 |
| carboplatin | F | 71 | Caucasian | SCLC           | IV  | Former  | 0 | 0.71 | 86  | 4.7  | 9.1  | 296 | 19.6 | 0 |
| carboplatin | M | 58 | Caucasian | Squamous       | IV  | Former  | 2 | 0.68 | 99  | 13.3 | 11   | 597 | 21.2 | 1 |
| carboplatin | F | 50 | Caucasian | adenocarcinoma | IV  | Current | 1 | 0.41 | 120 | 16.8 | 9.7  | 709 | 26.1 | 0 |
| carboplatin | M | 73 | Caucasian | other          | I   | Former  | 0 | 0.93 | 81  | 7.1  | 4.8  | 316 | 27.9 | 0 |
| cisplatin   | M | 50 | Caucasian | adenocarcinoma | IV  | Former  | 0 | 0.8  | 102 | 4.5  | 14.8 | 156 | 29.0 | 1 |
| cisplatin   | F | 71 | Caucasian | adenocarcinoma | IV  | Never   | 1 | 0.72 | 84  | 11.8 | 13.4 | 268 | 26.1 | 0 |
| carboplatin | M | 90 | Caucasian | SCLC           | II  | Former  | 2 | 0.82 | 78  | 7.5  | 15.1 | 140 | 26.6 | 0 |
| carboplatin | M | 57 | Caucasian | adenocarcinoma | IV  | Current | 2 | 0.58 | 112 | 16.3 | 14   | 366 | 21.3 | 0 |
| carboplatin | M | 55 | Caucasian | adenocarcinoma | IV  | Current | 3 | 0.58 | 115 | 4.1  | 11.8 | 189 | 19.9 | 0 |
| cisplatin   | M | 58 | Caucasian | adenocarcinoma | II  | Former  | 1 | 0.76 | 100 | 9.6  | 14.6 | 413 | 25.5 | 0 |
| carboplatin | F | 64 | Caucasian | SCLC           | IV  | Current | 2 | 0.38 | 112 | 5.3  | 11.5 | 342 | 20.4 | 0 |
| carboplatin | M | 72 | Caucasian | adenocarcinoma | IV  | Former  | 1 | 1.16 | 62  | 7.3  | 12.2 | 394 | 18.0 | 0 |
| carboplatin | F | 61 | Caucasian | adenocarcinoma | IV  | Current | 1 | 0.46 | 108 | 7.6  | 10.2 | 327 | 49.5 | 0 |
| cisplatin   | F | 57 | Caucasian | Squamous       | II  | Former  | 0 | 0.64 | 99  | 5.4  | 14.2 | 171 | 17.7 | 0 |
| carboplatin | M | 83 | Caucasian | Squamous       | III | Former  | 1 | 0.93 | 76  | 19.4 | 12.9 | 423 | 24.2 | 0 |
| carboplatin | M | 51 | AA        | adenocarcinoma | IV  | Never   | 1 | 0.89 | 114 | 4.4  | 14.3 | 332 | 24.2 | 0 |
| carboplatin | F | 52 | Caucasian | adenocarcinoma | IV  | Current | 2 | 0.83 | 81  | 12.8 | 10   | 302 | 39.5 | 0 |
| carboplatin | M | 58 | Caucasian | adenocarcinoma | IV  | Current | 0 | 0.84 | 96  | 9.7  | 14.5 | 422 | 27.5 | 0 |
| carboplatin | F | 71 | Caucasian | SCLC           | IV  | Former  | 1 | 0.63 | 90  | 6.9  | 13.3 | 190 | 29.4 | 0 |
| carboplatin | F | 66 | Caucasian | SCLC           | IV  | Former  | 1 | 0.54 | 98  | 12.8 | 12.2 | 284 | 33.3 | 1 |
| carboplatin | M | 67 | Caucasian | adenocarcinoma | IV  | Former  | 1 | 0.71 | 97  | 8.6  | 12.3 | 384 | 27.5 | 0 |
| carboplatin | F | 53 | Caucasian | adenocarcinoma | IV  | Current | 1 | 0.61 | 103 | 7.5  | 13.5 | 353 | 19.8 | 0 |
| carboplatin | M | 72 | Caucasian | SCLC           | IV  | Former  | 2 | 1.51 | 45  | 9.9  | 11.1 | 198 | 28.1 | 0 |
| carboplatin | F | 64 | Caucasian | adenocarcinoma | IV  | Former  | 1 | 0.7  | 90  | 6.8  | 15.1 | 307 | 32.3 | 0 |
| carboplatin | M | 81 | Caucasian | Squamous       | IV  | Current | 1 | 0.73 | 86  | 8.3  | 12.9 | 170 | 25.2 | 0 |
| cisplatin   | M | 74 | Caucasian | SCLC           | IV  | Current | 1 | 0.91 | 83  | 7.1  | 14.2 | 113 | 15.9 | 0 |
| carboplatin | M | 74 | Caucasian | Squamous       | III | Former  | 1 | 0.86 | 85  | 9    | 11.5 | 357 | 22.4 | 1 |
| carboplatin | F | 71 | Caucasian | adenocarcinoma | IV  | Current | 1 | 0.78 | 77  | 17.9 | 11.2 | 266 | 23.9 | 0 |
| carboplatin | M | 66 | Caucasian | adenocarcinoma | I   | Never   | 0 | 0.88 | 90  | 8.1  | 12.5 | 230 | 24.9 | 0 |
| carboplatin | F | 66 | Caucasian | adenocarcinoma | III | Former  | 1 | 0.66 | 92  | 10.4 | 11   | 425 | 29.3 | 0 |
| cisplatin   | F | 54 | Caucasian | adenocarcinoma | II  | Former  | 1 | 0.64 | 102 | 9.2  | 10.8 | 521 | 29.2 | 1 |
| carboplatin | M | 70 | Caucasian | Squamous       | III | Former  | 1 | 1.21 | 60  | 5.4  | 11.8 | 215 | 28.8 | 0 |
| carboplatin | M | 78 | Caucasian | adenocarcinoma | IV  | Former  | 1 | 0.7  | 90  | 6.4  | 10.9 | 332 | 25.1 | 0 |
| carboplatin | F | 53 | Caucasian | adenocarcinoma | IV  | Current | 0 | 0.53 | 110 | 9.3  | 13.8 | 257 | 21.6 | 1 |
| carboplatin | M | 61 | Caucasian | Squamous       | IV  | Current | 2 | 0.72 | 100 | 3.3  | 12.7 | 185 | 25.8 | 0 |
| carboplatin | M | 69 | Caucasian | adenocarcinoma | IV  | Current | 2 | 0.74 | 94  | 8    | 14.8 | 361 | 23.9 | 0 |
| carboplatin | M | 61 | Caucasian | squamous       | III | current | 1 | 0.83 | 95  | 8.3  | 13.9 | 269 | 32.8 | 0 |
| carboplatin | M | 38 | other     | adenocarcinoma | IV  | Current | 1 | 0.63 | 125 | 10.2 | 12.1 | 318 | 23.4 | 0 |
| carboplatin | M | 62 | Caucasian | adenocarcinoma | IV  | Former  | 1 | 0.82 | 95  | 10.4 | 15.2 | 256 | 27.2 | 0 |
| carboplatin | M | 63 | AA        | other          | IV  | Current | 1 | 0.74 | 113 | 12.5 | 14.1 | 376 | 15.9 | 0 |
| cisplatin   | F | 56 | Caucasian | SCLC           | III | Current | 1 | 0.89 | 73  | 8.7  | 11.1 | 206 | 23.4 | 0 |
| carboplatin | M | 58 | Caucasian | squamous       | III | former  | 2 | 0.86 | 95  | 10.3 | 13.1 | 185 | 38.3 | 0 |

|             |   |    |           |                |     |         |   |      |     |      |      |     |      |   |
|-------------|---|----|-----------|----------------|-----|---------|---|------|-----|------|------|-----|------|---|
| carboplatin | F | 69 | Caucasian | Squamous       | IV  | Former  | 0 | 0.83 | 72  | 12.6 | 10   | 543 | 27.5 | 0 |
| carboplatin | F | 62 | Caucasian | other          | III | Former  | 1 | 1.07 | 56  | 8.6  | 15.2 | 280 | 17.2 | 0 |
| carboplatin | M | 57 | Caucasian | adenocarcinoma | IV  | Former  | 1 | 0.89 | 95  | 7.9  | 13.4 | 185 | 28.0 | 1 |
| cisplatin   | M | 50 | Caucasian | Squamous       | III | Former  | 1 | 0.79 | 104 | 8.3  | 15.1 | 272 | 40.8 | 1 |
| carboplatin | M | 71 | Caucasian | adenocarcinoma | II  | Former  | 1 | 0.94 | 81  | 11.8 | 10.6 | 257 | 38.9 | 0 |
| carboplatin | M | 51 | Caucasian | adenocarcinoma | IV  | Current | 1 | 1.13 | 74  | 11.2 | 13.9 | 283 | 30.5 | 1 |
| carboplatin | F | 53 | Caucasian | Squamous       | IV  | Current | 1 | 0.64 | 102 | 14   | 10.7 | 401 | 29.8 | 0 |
| carboplatin | F | 76 | Caucasian | adenocarcinoma | IV  | Former  | 1 | 1.14 | 47  | 6.9  | 12.4 | 229 | 20.8 | 0 |
| cisplatin   | F | 65 | Caucasian | adenocarcinoma | II  | Former  | 0 | 0.69 | 100 | 4.8  | 12.8 | 301 | 28.8 | 0 |
| carboplatin | M | 68 | Caucasian | SCLC           | II  | Former  | 2 | 1.5  | 49  | 6.2  | 8.4  | 261 | 26.7 | 0 |
| carboplatin | M | 37 | Caucasian | adenocarcinoma | IV  | Current | 1 | 0.89 | 121 | 11.3 | 14.6 | 431 | 22.1 | 0 |
| carboplatin | F | 61 | Caucasian | adenocarcinoma | IV  | Former  | 1 | 0.61 | 98  | 7.2  | 11.1 | 356 | 26.2 | 0 |
| carboplatin | F | 68 | Caucasian | adenocarcinoma | III | Former  | 3 | 0.87 | 69  | 12.1 | 13   | 262 | 47.3 | 0 |
| carboplatin | F | 86 | Caucasian | adenocarcinoma | III | Former  | 1 | 0.72 | 76  | 5.3  | 13.1 | 303 | 21.3 | 0 |
| carboplatin | F | 67 | Caucasian | other          | IV  | Never   | 2 | 0.51 | 99  | 9.7  | 13.9 | 275 | 23.9 | 0 |
| carboplatin | F | 55 | Caucasian | Squamous       | IV  | Former  | 1 | 0.54 | 105 | 4.5  | 7.2  | 334 | 28.7 | 0 |
| cisplatin   | F | 54 | Caucasian | SCLC           | IV  | Current | 1 | 0.36 | 122 | 10   | 13.4 | 301 | 23.6 | 0 |
| carboplatin | F | 62 | Caucasian | Squamous       | IV  | Current | 1 | 0.6  | 99  | 9.9  | 12.6 | 223 | 27.5 | 1 |
| carboplatin | M | 66 | Caucasian | Squamous       | II  | Current | 1 | 0.88 | 90  | 8.7  | 12.3 | 236 | 34.6 | 0 |
| cisplatin   | M | 45 | AA        | adenocarcinoma | III | Current | 1 | 0.84 | 116 | 7.4  | 14.9 | 280 | 17.8 | 0 |
| carboplatin | M | 51 | Caucasian | adenocarcinoma | IV  | Current | 3 | 0.9  | 113 | 7.9  | 14.2 | 327 | 24.0 | 0 |
| cisplatin   | M | 62 | Caucasian | adenocarcinoma | III | former  | 0 | 0.83 | 109 | 9.6  | 13.6 | 403 | 27.3 | 1 |
| carboplatin | F | 47 | Caucasian | adenocarcinoma | III | Current | 1 | 0.5  | 116 | 9.1  | 11.6 | 414 | 28.6 | 0 |
| carboplatin | M | 66 | AA        | adenocarcinoma | IV  | Current | 0 | 0.98 | 92  | 9.9  | 13.9 | 248 | 22.5 | 0 |
| carboplatin | F | 68 | Caucasian | Squamous       | IV  | Former  | 1 | 0.6  | 94  | 11.3 | 11.8 | 450 | 29.0 | 0 |
| carboplatin | M | 48 | Caucasian | adenocarcinoma | IV  | Current | 1 | 0.56 | 122 | 15.9 | 15.2 | 346 | 21.3 | 1 |
| cisplatin   | M | 32 | Caucasian | SCLC           | IV  | Current | 1 | 0.74 | 121 | 7    | 13.4 | 250 | 48.3 | 0 |
| carboplatin | M | 47 | Caucasian | SCLC           | IV  | Current | 0 | 0.76 | 109 | 15.3 | 15.7 | 419 | 24.6 | 0 |
| carboplatin | M | 77 | Caucasian | Squamous       | III | Former  | 0 | 1.04 | 68  | 7.2  | 12.2 | 285 | 32.1 | 0 |
| carboplatin | F | 79 | Caucasian | Squamous       | IV  | Former  | 1 | 0.85 | 65  | 7.8  | 12.6 | 284 | 25.9 | 0 |
| cisplatin   | M | 70 | Caucasian | Squamous       | III | Former  | 1 | 0.58 | 103 | 15   | 12   | 505 | 25.4 | 1 |
| carboplatin | M | 65 | Caucasian | adenocarcinoma | III | Current | 1 | 0.69 | 99  | 3.9  | 11.1 | 357 | 31.1 | 0 |
| carboplatin | F | 48 | Caucasian | SCLC           | IV  | Current | 2 | 0.79 | 89  | 9.5  | 9.4  | 378 | 28.9 | 1 |
| carboplatin | F | 81 | Caucasian | adenocarcinoma | IV  | Never   | 1 | 0.86 | 63  | 9    | 12.9 | 314 | 20.4 | 0 |
| carboplatin | M | 65 | Caucasian | Squamous       | III | Former  | 1 | 1.09 | 71  | 10.1 | 13.4 | 366 | 25.6 | 0 |
| carboplatin | M | 69 | Caucasian | Squamous       | IV  | Former  | 1 | 1.35 | 53  | 8.1  | 15.3 | 221 | 27.3 | 1 |
| carboplatin | M | 70 | Caucasian | SCLC           | IV  | Current | 1 | 0.99 | 76  | 9.1  | 13.6 | 193 | 32.2 | 0 |
| carboplatin | F | 50 | Caucasian | adenocarcinoma | IV  | Current | 1 | 0.61 | 105 | 8.6  | 13.8 | 269 | 22.9 | 1 |
| carboplatin | F | 69 | AA        | adenocarcinoma | IV  | Never   | 1 | 0.88 | 78  | 6.4  | 13.7 | 328 | 29.2 | 1 |
| carboplatin | M | 65 | Caucasian | adenocarcinoma | IV  | Current | 1 | 0.9  | 89  | 6.8  | 13.7 | 225 | 21.6 | 0 |
| carboplatin | F | 73 | Caucasian | adenocarcinoma | IV  | former  | 0 | 0.84 | 69  | 6.7  | 14.3 | 319 | 24.1 | 0 |
| cisplatin   | F | 55 | Caucasian | SCLC           | IV  | Current | 1 | 0.77 | 86  | 8.9  | 11.2 | 363 | 22.5 | 1 |
| carboplatin | M | 51 | Caucasian | adenocarcinoma | III | Current | 0 | 0.77 | 104 | 10.2 | 14.1 | 354 | 27.1 | 0 |
| cisplatin   | M | 55 | Caucasian | squamous       | III | Current | 0 | 0.96 | 89  | 8.6  | 12   | 279 | 21.4 | 1 |
| carboplatin | M | 71 | Caucasian | adenocarcinoma | II  | former  | 1 | 1.08 | 68  | 11   | 15.5 | 432 | 26.2 | 1 |
| carboplatin | M | 69 | Caucasian | other          | III | Current | 1 | 0.82 | 90  | 13.1 | 11.9 | 514 | 24.1 | 1 |
| carboplatin | M | 65 | Caucasian | adenocarcinoma | III | current | 1 | 0.9  | 89  | 15.3 | 12.1 | 367 | 24.4 | 0 |
| carboplatin | F | 69 | Caucasian | Squamous       | IV  | former  | 1 | 0.84 | 71  | 7    | 12.5 | 450 | 27.0 | 0 |
| cisplatin   | M | 53 | Caucasian | adenocarcinoma | IV  | former  | 0 | 0.79 | 103 | 13.3 | 12.6 | 445 | 25.0 | 1 |
| carboplatin | F | 76 | Caucasian | adenocarcinoma | IV  | Former  | 1 | 0.93 | 60  | 6.1  | 12.6 | 248 | 23.2 | 0 |
| carboplatin | M | 58 | Caucasian | Squamous       | IV  | Current | 0 | 0.95 | 88  | 8.2  | 14.8 | 234 | 22.2 | 0 |
| carboplatin | F | 74 | Caucasian | SCLC           | IV  | Current | 3 | 0.47 | 95  | 22.3 | 11.1 | 242 | 18.9 | 1 |
| carboplatin | M | 58 | Caucasian | adenocarcinoma | II  | Former  | 1 | 1.07 | 76  | 7.8  | 13.4 | 207 | 31.6 | 0 |
| cisplatin   | F | 75 | Caucasian | adenocarcinoma | III | Current | 2 | 0.84 | 83  | 11.3 | 12.5 | 283 | 38.9 | 1 |
| carboplatin | F | 53 | Caucasian | adenocarcinoma | IV  | Former  | 1 | 1.01 | 57  | 12.8 | 9.9  | 511 | 24.6 | 0 |
| carboplatin | M | 60 | Caucasian | adenocarcinoma | III | Former  | 1 | 0.98 | 83  | 6.8  | 15.6 | 146 | 27.8 | 0 |
| cisplatin   | M | 64 | Caucasian | SCLC           | III | Current | 0 | 0.64 | 103 | 11.2 | 16.8 | 326 | 27.6 | 0 |
| carboplatin | M | 64 | Caucasian | adenocarcinoma | IV  | Current | 1 | 0.66 | 100 | 9.7  | 13.6 | 373 | 24.1 | 0 |
| cisplatin   | F | 51 | Caucasian | SCLC           | IV  | Current | 2 | 0.56 | 108 | 5.5  | 12.9 | 345 | 23.7 | 1 |
| cisplatin   | M | 63 | Caucasian | SCLC           | IV  | former  | 0 | 0.83 | 85  | 8.3  | 15.7 | 300 | 24.5 | 0 |
| carboplatin | M | 75 | Caucasian | adenocarcinoma | IV  | Former  | 0 | 1.21 | 58  | 15.4 | 13   | 184 | 26.4 | 0 |
| carboplatin | M | 72 | Caucasian | adenocarcinoma | IV  | Former  | 1 | 0.84 | 87  | 3.9  | 9.3  | 122 | 25.6 | 1 |
| cisplatin   | M | 52 | Caucasian | SCLC           | II  | current | 0 | 1.11 | 77  | 6.3  | 14.3 | 160 | 34.7 | 0 |
| carboplatin | F | 69 | Caucasian | adenocarcinoma | II  | Former  | 0 | 0.75 | 81  | 10.4 | 11.3 | 453 | 24.6 | 0 |
| carboplatin | M | 71 | Caucasian | SCLC           | IV  | Current | 3 | 1.07 | 68  | 6.3  | 9.9  | 165 | 27.2 | 0 |
| carboplatin | M | 67 | Caucasian | adenocarcinoma | III | former  | 1 | 0.72 | 90  | 11.1 | 13.4 | 273 | 21.7 | 0 |
| cisplatin   | F | 57 | Caucasian | adenocarcinoma | III | current | 0 | 0.69 | 97  | 12.8 | 13.1 | 269 | 21.5 | 0 |
| carboplatin | M | 65 | Caucasian | squamous       | III | former  | 1 | 0.76 | 94  | 10.3 | 14.5 | 294 | 34.9 | 0 |
| cisplatin   | M | 55 | Caucasian | Squamous       | II  | Current | 0 | 0.93 | 92  | 5.3  | 13   | 470 | 22.9 | 0 |
| carboplatin | M | 53 | Caucasian | SCLC           | IV  | Current | 1 | 0.78 | 99  | 10.8 | 14.8 | 336 | 27.9 | 0 |
| carboplatin | M | 70 | Caucasian | adenocarcinoma | IV  | Current | 1 | 0.85 | 88  | 8.8  | 13.5 | 200 | 22.5 | 0 |
| carboplatin | F | 70 | Caucasian | adenocarcinoma | IV  | former  | 1 | 0.6  | 92  | 7.3  | 11   | 324 | 26.3 | 1 |
| carboplatin | M | 61 | Caucasian | other          | IV  | Current | 1 | 0.84 | 93  | 6.6  | 14.4 | 271 | 27.6 | 0 |
| carboplatin | F | 56 | Caucasian | other          | IV  | Current | 1 | 0.72 | 94  | 13   | 14.7 | 296 | 24.6 | 0 |

|             |   |    |           |                |     |         |   |      |     |      |      |     |      |   |
|-------------|---|----|-----------|----------------|-----|---------|---|------|-----|------|------|-----|------|---|
| carboplatin | M | 80 | Caucasian | adenocarcinoma | III | Former  | 1 | 0.93 | 77  | 5.5  | 14.4 | 215 | 24.1 | 1 |
| carboplatin | M | 68 | Caucasian | SCLC           | IV  | Former  | 1 | 0.59 | 101 | 7.4  | 14.5 | 337 | 27.8 | 0 |
| cisplatin   | F | 48 | Caucasian | adenocarcinoma | IV  | current | 1 | 0.5  | 112 | 19.1 | 12.5 | 315 | 23.7 | 0 |
| carboplatin | M | 78 | Caucasian | SCLC           | IV  | Current | 0 | 0.55 | 111 | 11   | 10.7 | 169 | 19.9 | 0 |
| carboplatin | F | 80 | Caucasian | Squamous       | IV  | never   | 1 | 0.8  | 70  | 8.1  | 11.5 | 312 | 24.3 | 1 |
| cisplatin   | M | 63 | Caucasian | SCLC           | IV  | current | 0 | 0.85 | 92  | 8.1  | 14.2 | 211 | 28.2 | 0 |
| carboplatin | F | 57 | Caucasian | adenocarcinoma | IV  | Former  | 1 | 0.81 | 79  | 6.1  | 10   | 100 | 25.2 | 0 |
| carboplatin | M | 51 | Caucasian | Squamous       | III | Former  | 1 | 0.78 | 102 | 25   | 10.8 | 547 | 23.9 | 0 |
| carboplatin | F | 74 | Caucasian | SCLC           | IV  | Current | 3 | 1.01 | 55  | 11.3 | 14.8 | 135 | 28.0 | 0 |
| carboplatin | F | 66 | Caucasian | SCLC           | IV  | Current | 1 | 0.77 | 81  | 7    | 13.7 | 279 | 42.7 | 0 |
| carboplatin | M | 56 | AA        | adenocarcinoma | IV  | current | 0 | 1.17 | 78  | 6    | 14.5 | 247 | 23.2 | 0 |
| cisplatin   | F | 53 | Caucasian | SCLC           | III | current | 0 | 0.67 | 100 | 11   | 15.1 | 200 | 27.7 | 0 |
| carboplatin | F | 41 | Caucasian | adenocarcinoma | IV  | never   | 0 | 0.79 | 91  | 6.8  | 10.6 | 376 | 27.6 | 0 |
| carboplatin | M | 68 | Caucasian | Squamous       | III | Former  | 1 | 0.88 | 86  | 7    | 14   | 216 | 33.2 | 0 |
| cisplatin   | F | 57 | Caucasian | SCLC           | IV  | former  | 0 | 0.89 | 72  | 5.2  | 10.3 | 145 | 25.6 | 0 |
| carboplatin | M | 76 | Caucasian | adenocarcinoma | IV  | Former  | 1 | 0.9  | 89  | 11.6 | 13.5 | 482 | 27.5 | 0 |
| carboplatin | M | 61 | AA        | adenocarcinoma | IV  | current | 1 | 0.72 | 100 | 3.6  | 10   | 210 | 20.1 | 0 |
| carboplatin | M | 62 | AA        | Squamous       | IV  | Current | 0 | 1.44 | 60  | 11.7 | 13.9 | 379 | 31.4 | 0 |
| carboplatin | M | 68 | Caucasian | adenocarcinoma | II  | never   | 1 | 0.84 | 90  | 3.7  | 12.9 | 169 | 29.9 | 0 |
| cisplatin   | M | 57 | Caucasian | SCLC           | IV  | Former  | 1 | 0.78 | 100 | 12.7 | 13.2 | 284 | 25.5 | 0 |
| cisplatin   | M | 42 | AA        | Squamous       | IV  | current | 1 | 1.04 | 88  | 7.7  | 9.9  | 556 | 22.5 | 0 |
| cisplatin   | F | 65 | Caucasian | SCLC           | IV  | current | 1 | 0.52 | 99  | 10.9 | 10.6 | 595 | 19.0 | 0 |
| cisplatin   | M | 69 | Caucasian | adenocarcinoma | II  | Current | 1 | 0.9  | 87  | 2.2  | 15.2 | 96  | 26.2 | 0 |
| carboplatin | M | 67 | Caucasian | other          | IV  | Current | 2 | 0.98 | 77  | 14.1 | 14.3 | 248 | 37.1 | 0 |
| cisplatin   | F | 59 | Caucasian | adenocarcinoma | IV  | Former  | 0 | 0.55 | 102 | 4.8  | 10   | 340 | 23.0 | 1 |
| carboplatin | F | 69 | Caucasian | adenocarcinoma | III | Current | 2 | 0.69 | 86  | 8.7  | 14.1 | 334 | 24.4 | 0 |
| cisplatin   | F | 68 | Caucasian | adenocarcinoma | III | Current | 0 | 0.79 | 76  | 8.4  | 13.3 | 490 | 21.6 | 0 |
| cisplatin   | M | 65 | Caucasian | squamous       | I   | former  | 0 | 0.84 | 89  | 12.2 | 14.4 | 292 | 31.4 | 0 |
| carboplatin | F | 54 | Caucasian | SCLC           | IV  | current | 1 | 0.75 | 91  | 6.9  | 13.3 | 195 | 22.3 | 0 |
| carboplatin | M | 55 | Caucasian | adenocarcinoma | III | current | 1 | 0.84 | 96  | 7.4  | 13.7 | 316 | 21.3 | 0 |
| carboplatin | F | 73 | Caucasian | adenocarcinoma | IV  | never   | 1 | 0.77 | 75  | 6.9  | 13.5 | 308 | 24.0 | 0 |
| carboplatin | M | 72 | Caucasian | squamous       | IV  | current | 1 | 1.16 | 62  | 8.3  | 12.3 | 346 | 20.8 | 0 |
| carboplatin | F | 66 | Caucasian | squamous       | III | former  | 1 | 0.81 | 74  | 7.3  | 11.1 | 346 | 23.8 | 0 |
| carboplatin | F | 56 | AA        | adenocarcinoma | IV  | Current | 1 | 0.98 | 75  | 5.4  | 10.1 | 284 | 28.5 | 0 |
| carboplatin | M | 67 | Caucasian | other          | III | former  | 2 | 1    | 89  | 7.6  | 10.4 | 549 | 31.2 | 1 |
| carboplatin | M | 72 | Caucasian | adenocarcinoma | IV  | former  | 0 | 1.18 | 87  | 5.6  | 10.9 | 164 | 25.6 | 0 |
| carboplatin | F | 63 | Caucasian | adenocarcinoma | IV  | former  | 1 | 0.58 | 96  | 11.7 | 14.6 | 359 | 40.0 | 0 |
| cisplatin   | F | 68 | Caucasian | adenocarcinoma | IV  | never   | 1 | 0.89 | 66  | 5.4  | 14.4 | 208 | 31.4 | 1 |
| carboplatin | M | 76 | AA        | Squamous       | IV  | former  | 0 | 0.66 | 100 | 4.7  | 11.9 | 182 | 23.6 | 0 |
| cisplatin   | M | 54 | Caucasian | Squamous       | III | former  | 0 | 0.73 | 105 | 9.4  | 13.5 | 365 | 26.7 | 0 |
| cisplatin   | F | 57 | Caucasian | adenocarcinoma | III | former  | 0 | 0.72 | 99  | 13.7 | 12.8 | 282 | 17.7 | 0 |
| carboplatin | M | 78 | Caucasian | adenocarcinoma | III | Never   | 1 | 0.95 | 75  | 5.9  | 10.2 | 264 | 28.5 | 0 |
| carboplatin | F | 76 | Caucasian | adenocarcinoma | IV  | former  | 1 | 0.73 | 80  | 9.4  | 13.7 | 341 | 33.1 | 0 |
| carboplatin | F | 60 | Caucasian | adenocarcinoma | IV  | never   | 1 | 0.75 | 86  | 9.9  | 12.1 | 166 | 28.0 | 0 |
| carboplatin | F | 75 | Caucasian | adenocarcinoma | III | former  | 1 | 0.7  | 85  | 8.9  | 12.4 | 310 | 32.3 | 0 |
| carboplatin | F | 52 | Caucasian | adenocarcinoma | IV  | current | 0 | 0.71 | 96  | 9.7  | 13.1 | 486 | 22.2 | 0 |
| carboplatin | F | 61 | Caucasian | SCLC           | IV  | current | 1 | 0.83 | 76  | 10.3 | 11.4 | 428 | 52.5 | 0 |
| carboplatin | M | 52 | Caucasian | adenocarcinoma | IV  | former  | 1 | 1    | 86  | 10.4 | 13.4 | 129 | 28.1 | 0 |
| cisplatin   | M | 60 | Caucasian | adenocarcinoma | III | current | 0 | 0.7  | 105 | 11.6 | 11.7 | 582 | 21.6 | 0 |
| carboplatin | M | 54 | other     | adenocarcinoma | III | current | 2 | 0.58 | 112 | 7.8  | 10.2 | 372 | 22.9 | 1 |
| carboplatin | F | 77 | Caucasian | squamous       | IV  | current | 2 | 0.79 | 72  | 19.4 | 10.3 | 378 | 22.0 | 1 |
| carboplatin | F | 61 | Caucasian | adenocarcinoma | IV  | current | 2 | 0.63 | 94  | 8.8  | 14   | 351 | 23.9 | 0 |
| cisplatin   | M | 65 | Caucasian | SCLC           | IV  | current | 1 | 0.66 | 105 | 7.1  | 15.2 | 258 | 16.5 | 0 |
| carboplatin | M | 63 | Caucasian | adenocarcinoma | IV  | former  | 2 | 0.7  | 88  | 8.1  | 12.6 | 290 | 20.0 | 0 |
| carboplatin | F | 67 | Caucasian | SCLC           | IV  | current | 1 | 2.51 | 20  | 8.8  | 12.2 | 342 | 27.3 | 0 |
| carboplatin | M | 60 | Caucasian | squamous       | II  | current | 1 | 1.06 | 76  | 9.5  | 14.8 | 272 | 18.8 | 0 |
| carboplatin | M | 68 | Caucasian | SCLC           | IV  | current | 3 | 1.17 | 62  | 7.4  | 8.5  | 223 | 32.0 | 0 |
| carboplatin | M | 71 | Caucasian | adenocarcinoma | IV  | former  | 1 | 1.02 | 76  | 6.6  | 12.4 | 271 | 33.5 | 0 |
| carboplatin | M | 80 | Caucasian | SCLC           | IV  | former  | 3 | 1.17 | 63  | 11.4 | 13.8 | 250 | 32.4 | 0 |
| carboplatin | M | 80 | Caucasian | SCLC           | III | current | 2 | 1.12 | 60  | 9.7  | 15.5 | 344 | 25.2 | 0 |
| cisplatin   | F | 65 | Caucasian | SCLC           | IV  | current | 3 | 0.51 | 101 | 5.4  | 11.4 | 337 | 16.5 | 1 |
| carboplatin | F | 57 | Caucasian | adenocarcinoma | III | former  | 0 | 0.92 | 67  | 5.4  | 12.1 | 301 | 27.5 | 0 |
| carboplatin | M | 63 | Caucasian | squamous       | IV  | former  | 1 | 0.95 | 82  | 5    | 14.6 | 221 | 32.1 | 1 |
| carboplatin | M | 57 | Caucasian | SCLC           | IV  | current | 2 | 1.38 | 44  | 7.8  | 11.5 | 341 | 28.6 | 1 |
| carboplatin | F | 41 | Caucasian | adenocarcinoma | IV  | former  | 3 | 0.6  | 110 | 7.9  | 11.8 | 261 | 24.0 | 1 |
| cisplatin   | F | 57 | AA        | other          | III | current | 1 | 0.75 | 81  | 5.9  | 12   | 204 | 23.2 | 1 |
| carboplatin | M | 58 | Caucasian | SCLC           | IV  | current | 1 | 0.86 | 93  | 5.5  | 11.9 | 341 | 22.0 | 0 |
| carboplatin | F | 75 | Caucasian | other          | IV  | never   | 2 | 0.75 | 77  | 7.2  | 10   | 448 | 25.2 | 0 |
| carboplatin | M | 57 | Caucasian | adenocarcinoma | IV  | never   | 2 | 0.85 | 95  | 13   | 13.3 | 282 | 30.8 | 1 |
| carboplatin | F | 55 | Caucasian | other          | IV  | current | 1 | 0.7  | 100 | 11.9 | 12.3 | 483 | 18.3 | 0 |
| carboplatin | M | 79 | Caucasian | SCLC           | IV  | never   | 2 | 0.96 | 73  | 6.1  | 14.6 | 273 | 22.6 | 0 |
| carboplatin | F | 57 | AA        | adenocarcinoma | IV  | current | 1 | 0.68 | 94  | 13   | 13.3 | 184 | 21.7 | 0 |
| carboplatin | F | 71 | Caucasian | adenocarcinoma | IV  | current | 0 | 0.64 | 92  | 12.5 | 14.5 | 444 | 21.9 | 0 |
| carboplatin | F | 67 | Caucasian | adenocarcinoma | IV  | former  | 1 | 0.59 | 93  | 5.8  | 11.2 | 618 | 26.2 | 0 |

|             |   |              |                |     |         |   |      |     |      |      |     |      |   |
|-------------|---|--------------|----------------|-----|---------|---|------|-----|------|------|-----|------|---|
| cisplatin   | M | 63 other     | SCLC           | IV  | current | 3 | 0.77 | 80  | 12.4 | 13.3 | 260 | 25.7 | 0 |
| carboplatin | F | 72 Caucasian | adenocarcinoma | IV  | current | 1 | 0.94 | 59  | 8.9  | 10.6 | 285 | 28.1 | 0 |
| cisplatin   | F | 53 Caucasian | squamous       | III | current | 1 | 0.62 | 100 | 7.6  | 11   | 375 | 19.1 | 0 |
| cisplatin   | F | 65 AA        | squamous       | III | never   | 1 | 0.72 | 93  | 7.5  | 12.9 | 316 | 33.0 | 0 |
| cisplatin   | F | 49 Caucasian | SCLC           | IV  | current | 3 | 0.71 | 106 | 3.3  | 10.2 | 209 | 24.5 | 0 |
| cisplatin   | F | 63 Caucasian | adenocarcinoma | III | former  | 0 | 0.81 | 86  | 7.3  | 13.4 | 315 | 22.1 | 0 |
| carboplatin | M | 55 Caucasian | adenocarcinoma | IV  | current | 1 | 0.71 | 108 | 21.6 | 15.5 | 246 | 23.9 | 0 |
| carboplatin | M | 56 Caucasian | adenocarcinoma | IV  | never   | 0 | 1.09 | 71  | 8.6  | 13.2 | 299 | 23.7 | 0 |
| carboplatin | M | 84 Caucasian | squamous       | III | current | 1 | 0.75 | 84  | 12.2 | 13.7 | 225 | 23.6 | 0 |
| carboplatin | F | 59 Caucasian | adenocarcinoma | IV  | current | 0 | 0.73 | 88  | 17.8 | 13.6 | 311 | 29.6 | 0 |
| carboplatin | M | 56 Caucasian | adenocarcinoma | IV  | current | 2 | 0.73 | 101 | 8.2  | 14.7 | 413 | 22.1 | 0 |
| cisplatin   | M | 59 AA        | adenocarcinoma | II  | current | 2 | 0.96 | 98  | 6.2  | 12.4 | 224 | 21.4 | 0 |
| carboplatin | M | 70 Caucasian | squamous       | III | current | 2 | 0.9  | 86  | 8    | 15.2 | 282 | 30.0 | 1 |
| carboplatin | F | 75 Caucasian | SCLC           | III | current | 3 | 0.77 | 74  | 11   | 13.8 | 263 | 20.1 | 0 |
| carboplatin | F | 54 Caucasian | adenocarcinoma | II  | current | 1 | 0.77 | 86  | 6    | 12.3 | 177 | 28.1 | 1 |
| carboplatin | F | 64 AA        | squamous       | IV  | Former  | 1 | 1.09 | 60  | 6.5  | 12.4 | 260 | 31.6 | 0 |
| carboplatin | M | 74 Caucasian | SCLC           | IV  | former  | 0 | 1.05 | 69  | 8    | 14   | 95  | 30.9 | 1 |
| carboplatin | M | 57 Caucasian | SCLC           | IV  | current | 3 | 0.81 | 97  | 6.6  | 12   | 214 | 25.8 | 0 |
| carboplatin | m | 77 Caucasian | adenocarcinoma | IV  | current | 0 | 0.82 | 76  | 5.3  | 14.1 | 201 | 24.3 | 1 |
| cisplatin   | M | 64 Caucasian | squamous       | II  | current | 1 | 0.92 | 91  | 10.9 | 14.3 | 308 | 26.5 | 0 |
| carboplatin | M | 74 Caucasian | adenocarcinoma | IV  | former  | 2 | 0.7  | 91  | 7.8  | 13.9 | 258 | 28.1 | 0 |
| carboplatin | F | 78 Caucasian | adenocarcinoma | III | former  | 2 | 0.87 | 63  | 7.6  | 13.1 | 213 | 31.3 | 1 |
| carboplatin | F | 55 Caucasian | other          | IV  | current | 2 | 0.6  | 110 | 10.3 | 12.4 | 367 | 16.7 | 1 |
| carboplatin | F | 75 Caucasian | squamous       | III | former  | 1 | 0.78 | 73  | 6.6  | 14.1 | 187 | 25.9 | 0 |
| cisplatin   | M | 58 Caucasian | squamous       | III | current | 1 | 0.68 | 102 | 13   | 13.5 | 497 | 18.9 | 0 |
| cisplatin   | F | 78 Caucasian | SCLC           | III | never   | 1 | 0.49 | 92  | 3.3  | 11.8 | 270 | 22.6 | 0 |
| cisplatin   | F | 55 Caucasian | adenocarcinoma | IV  | never   | 2 | 0.66 | 98  | 6.4  | 12.4 | 206 | 32.8 | 1 |
| carboplatin | M | 48 AA        | adenocarcinoma | III | former  | 1 | 1.11 | 89  | 4.9  | 14.6 | 210 | 41.1 | 1 |
| carboplatin | F | 47 AA        | SCLC           | III | current | 1 | 0.79 | 100 | 6    | 10.8 | 626 | 26.2 | 0 |
| carboplatin | M | 67 Caucasian | adenocarcinoma | IV  | current | 2 | 1.11 | 74  | 7.3  | 10.5 | 180 | 27.6 | 0 |
| carboplatin | M | 58 AA        | adenocarcinoma | IV  | current | 2 | 1.08 | 73  | 5.5  | 14.1 | 150 | 21.9 | 1 |
| carboplatin | M | 82 Caucasian | adenocarcinoma | III | former  | 2 | 1.15 | 57  | 5.6  | 9.9  | 154 | 25.0 | 0 |
| cisplatin   | M | 66 Caucasian | adenocarcinoma | III | former  | 0 | 0.84 | 89  | 5.8  | 14.9 | 285 | 27.0 | 0 |
| cisplatin   | F | 57 Caucasian | SCLC           | IV  | former  | 3 | 0.7  | 100 | 17.5 | 14.5 | 224 | 34.6 | 1 |
| cisplatin   | F | 64 Caucasian | SCLC           | IV  | current | 3 | 0.51 | 98  | 6.4  | 11.5 | 240 | 26.6 | 0 |
| carboplatin | F | 65 Caucasian | adenocarcinoma | IV  | never   | 1 | 0.55 | 98  | 6.6  | 12.4 | 314 | 18.8 | 0 |
| carboplatin | M | 48 Caucasian | adenocarcinoma | III | current | 1 | 0.69 | 110 | 9.5  | 11.6 | 372 | 33.3 | 0 |
| carboplatin | M | 81 Caucasian | squamous       | IV  | former  | 2 | 0.73 | 88  | 8.7  | 12.1 | 413 | 22.8 | 0 |
| carboplatin | F | 73 Caucasian | SCLC           | III | former  | 2 | 0.82 | 67  | 7.9  | 10.9 | 38  | 34.9 | 0 |
| cisplatin   | M | 53 Caucasian | squamous       | III | current | 1 | 0.71 | 104 | 6.6  | 12.4 | 290 | 40.7 | 0 |
| carboplatin | F | 49 other     | adenocarcinoma | IV  | never   | 0 | 0.79 | 103 | 4.9  | 12.3 | 283 | 18.7 | 0 |
| cisplatin   | F | 58 Caucasian | SCLC           | IV  | current | 2 | 0.6  | 100 | 8.7  | 15   | 142 | 21.3 | 0 |
| carboplatin | F | 73 Caucasian | adenocarcinoma | IV  | former  | 1 | 0.42 | 99  | 8.7  | 10.7 | 293 | 18.9 | 0 |
| carboplatin | M | 81 Caucasian | SCLC           | IV  | current | 2 | 0.73 | 75  | 7.5  | 15   | 190 | 25.6 | 0 |
| carboplatin | M | 50 Caucasian | squamous       | IV  | current | 1 | 0.92 | 94  | 6.3  | 14.4 | 204 | 24.1 | 1 |
| carboplatin | M | 72 Caucasian | SCLC           | I   | current | 2 | 1.78 | 41  | 17.4 | 12.6 | 277 | 23.7 | 0 |
| carboplatin | M | 67 AA        | squamous       | III | current | 0 | 0.96 | 80  | 9    | 9.9  | 385 | 21.4 | 0 |
| carboplatin | F | 66 Caucasian | adenocarcinoma | IV  | current | 1 | 0.72 | 82  | 10.1 | 12.5 | 425 | 22.8 | 0 |
| carboplatin | M | 69 Caucasian | adenocarcinoma | III | current | 0 | 0.82 | 89  | 7    | 13   | 254 | 25.9 | 0 |
| carboplatin | F | 58 Caucasian | SCLC           | IV  | current | 2 | 0.72 | 91  | 10.3 | 11.2 | 351 | 24.4 | 0 |
| carboplatin | M | 58 Caucasian | squamous       | III | current | 2 | 1.39 | 55  | 10.1 | 11.1 | 536 | 22.7 | 0 |
| cisplatin   | F | 67 Caucasian | SCLC           | IV  | current | 1 | 0.57 | 96  | 14.3 | 12.3 | 406 | 17.3 | 0 |
| carboplatin | M | 59 Caucasian | adenocarcinoma | IV  | current | 2 | 0.82 | 95  | 11.8 | 16.6 | 373 | 21.6 | 0 |
| carboplatin | F | 42 Caucasian | adenocarcinoma | IV  | former  | 2 | 0.69 | 108 | 5.9  | 13.4 | 322 | 22.4 | 0 |
| cisplatin   | M | 67 Caucasian | other          | III | current | 3 | 0.69 | 96  | 9.9  | 13.8 | 283 | 27.3 | 0 |
| carboplatin | M | 59 Caucasian | adenocarcinoma | III | current | 1 | 0.83 | 93  | 2.6  | 9.8  | 238 | 29.9 | 0 |
| carboplatin | F | 63 Caucasian | squamous       | III | current | 2 | 0.65 | 92  | 7.7  | 13.5 | 284 | 27.3 | 0 |
| carboplatin | F | 62 Caucasian | SCLC           | IV  | current | 2 | 0.48 | 103 | 8.2  | 11.6 | 312 | 24.3 | 0 |
| carboplatin | M | 61 Caucasian | adenocarcinoma | IV  | former  | 0 | 0.89 | 89  | 8.2  | 14   | 331 | 35.0 | 0 |
| carboplatin | M | 73 Caucasian | adenocarcinoma | III | former  | 1 | 0.92 | 88  | 8.2  | 14.4 | 305 | 25.3 | 0 |
| cisplatin   | M | 47 other     | squamous       | IV  | former  | 2 | 0.66 | 108 | 2.6  | 12.5 | 137 | 30.1 | 0 |
| carboplatin | M | 55 Caucasian | adenocarcinoma | IV  | current | 2 | 0.84 | 85  | 9.8  | 14.4 | 305 | 25.0 | 1 |
| cisplatin   | M | 71 Caucasian | squamous       | IV  | former  | 1 | 0.93 | 89  | 6.7  | 13.2 | 355 | 26.9 | 0 |
| carboplatin | M | 80 Caucasian | adenocarcinoma | III | current | 2 | 1.03 | 72  | 8    | 13.1 | 228 | 24.9 | 0 |
| carboplatin | M | 58 Caucasian | adenocarcinoma | IV  | never   | 1 | 0.81 | 95  | 6.2  | 15.9 | 214 | 28.7 | 0 |
| cisplatin   | M | 54 Caucasian | adenocarcinoma | III | current | 2 | 0.79 | 100 | 9    | 15.1 | 314 | 24.8 | 0 |
| carboplatin | M | 79 Caucasian | adenocarcinoma | IV  | former  | 2 | 1.2  | 56  | 30.1 | 10.1 | 144 | 20.7 | 0 |
| cisplatin   | F | 69 Caucasian | SCLC           | IV  | former  | 1 | 0.51 | 96  | 3.5  | 8.7  | 167 | 29.0 | 0 |
| carboplatin | F | 79 Caucasian | adenocarcinoma | IV  | never   | 1 | 0.57 | 88  | 15.7 | 14.8 | 184 | 31.3 | 0 |
| cisplatin   | F | 73 Caucasian | adenocarcinoma | III | former  | 2 | 0.74 | 79  | 7.8  | 13   | 280 | 29.4 | 0 |
| carboplatin | M | 80 AA        | other          | IV  | former  | 2 | 1.21 | 49  | 5.5  | 11.9 | 171 | 24.2 | 1 |
| carboplatin | F | 75 Caucasian | other          | IV  | current | 3 | 0.47 | 96  | 8.4  | 12.7 | 305 | 23.6 | 1 |
| carboplatin | F | 79 Caucasian | other          | I   | former  | 0 | 0.74 | 75  | 5.8  | 11.6 | 335 | 19.3 | 1 |
| carboplatin | M | 51 Caucasian | Other          | IV  | current | 1 | 0.93 | 93  | 19.3 | 11.5 | 134 | 23.5 | 1 |

|             |   |    |           |                |     |         |   |      |     |      |      |     |      |   |
|-------------|---|----|-----------|----------------|-----|---------|---|------|-----|------|------|-----|------|---|
| carboplatin | F | 79 | Caucasian | squamous       | IV  | former  | 2 | 0.83 | 75  | 9.8  | 11.2 | 315 | 32.6 | 0 |
| carboplatin | F | 50 | Caucasian | adenocarcinoma | IV  | current | 2 | 0.57 | 108 | 21.1 | 10.1 | 608 | 24.4 | 0 |
| carboplatin | F | 64 | Caucasian | other          | II  | current | 2 | 0.71 | 96  | 15.8 | 8    | 496 | 33.8 | 0 |
| carboplatin | F | 56 | AA        | adenocarcinoma | IV  | current | 1 | 0.88 | 79  | 3.8  | 14.3 | 186 | 31.0 | 0 |
| cisplatin   | F | 35 | Caucasian | SCLC           | IV  | never   | 3 | 0.69 | 113 | 15.8 | 12.7 | 522 | 41.5 | 0 |
| carboplatin | M | 60 | AA        | other          | IV  | current | 2 | 0.62 | 120 | 12.1 | 11.7 | 312 | 30.0 | 0 |
| carboplatin | F | 57 | AA        | SCLC           | IV  | current | 2 | 0.76 | 99  | 10.2 | 11.5 | 776 | 42.7 | 0 |
| cisplatin   | M | 61 | other     | other          | II  | current | 2 | 0.97 | 82  | 5.6  | 15.7 | 133 | 21.9 | 0 |
| carboplatin | F | 67 | Caucasian | adenocarcinoma | IV  | current | 2 | 0.73 | 92  | 9.6  | 14.3 | 368 | 24.5 | 0 |
| carboplatin | F | 74 | AA        | adenocarcinoma | IV  | Current | 2 | 0.64 | 101 | 7.2  | 12.3 | 288 | 28.6 | 1 |
| carboplatin | M | 89 | Caucasian | squamous       | IV  | former  | 1 | 0.87 | 76  | 6.1  | 12.7 | 188 | 29.2 | 0 |
| carboplatin | M | 73 | Caucasian | adenocarcinoma | IV  | current | 2 | 0.83 | 86  | 8.1  | 12.9 | 387 | 22.9 | 0 |
| cisplatin   | M | 59 | Caucasian | squamous       | III | former  | 2 | 0.81 | 101 | 8.5  | 14.3 | 297 | 29.5 | 0 |
| cisplatin   | M | 60 | Caucasian | SCLC           | IV  | current | 0 | 0.81 | 95  | 16.7 | 15.5 | 210 | 38.0 | 1 |
| carboplatin | F | 79 | Caucasian | adenocarcinoma | IV  | former  | 2 | 0.95 | 58  | 7.7  | 12.1 | 231 | 18.4 | 0 |
| carboplatin | M | 58 | Caucasian | adenocarcinoma | III | current | 2 | 0.93 | 89  | 8.2  | 14.7 | 290 | 22.9 | 0 |
| carboplatin | M | 88 | Caucasian | adenocarcinoma | III | never   | 1 | 1.38 | 45  | 6.4  | 12.9 | 199 | 19.9 | 0 |
| carboplatin | F | 52 | Caucasian | adenocarcinoma | IV  | current | 1 | 0.72 | 91  | 17.8 | 11.5 | 214 | 32.9 | 1 |
| cisplatin   | M | 66 | Caucasian | adenocarcinoma | III | former  | 0 | 0.84 | 89  | 5.8  | 14.9 | 167 | 33.3 | 0 |
| carboplatin | F | 52 | Caucasian | adenocarcinoma | IV  | current | 0 | 0.62 | 104 | 8.3  | 12.8 | 252 | 26.5 | 0 |
| carboplatin | F | 63 | Caucasian | SCLC           | IV  | current | 2 | 0.57 | 93  | 9.7  | 13.5 | 333 | 23.3 | 0 |
| carboplatin | M | 75 | other     | SCLC           | IV  | never   | 2 | 0.94 | 93  | 2.5  | 12.3 | 139 | 21.2 | 0 |
| cisplatin   | F | 66 | Caucasian | SCLC           | IV  | current | 2 | 0.45 | 94  | 12.5 | 16.3 | 389 | 34.0 | 1 |
| carboplatin | M | 55 | Caucasian | squamous       | III | current | 1 | 0.7  | 94  | 5.8  | 12.5 | 363 | 22.6 | 0 |
| carboplatin | M | 59 | Caucasian | adenocarcinoma | IV  | former  | 2 | 0.74 | 102 | 12.1 | 12   | 244 | 32.8 | 0 |
| carboplatin | F | 81 | Caucasian | SCLC           | III | former  | 3 | 0.58 | 84  | 7.1  | 12.1 | 494 | 24.1 | 0 |
| carboplatin | F | 54 | Caucasian | SCLC           | I   | current | 0 | 0.54 | 117 | 4.2  | 13.1 | 195 | 20.3 | 0 |
| carboplatin | F | 75 | Caucasian | adenocarcinoma | IV  | former  | 1 | 0.78 | 73  | 6.9  | 10.7 | 199 | 37.1 | 0 |
| carboplatin | M | 75 | Caucasian | adenocarcinoma | III | former  | 2 | 1.21 | 44  | 8    | 11.7 | 273 | 31.5 | 0 |
| carboplatin | F | 71 | Caucasian | squamous       | IV  | former  | 2 | 0.94 | 64  | 6.4  | 7.7  | 390 | 23.3 | 0 |
| carboplatin | F | 71 | Caucasian | adenocarcinoma | III | former  | 1 | 0.81 | 74  | 8.8  | 12.7 | 294 | 33.6 | 0 |
| carboplatin | M | 65 | AA        | adenocarcinoma | IV  | current | 1 | 0.97 | 89  | 4.9  | 12.4 | 258 | 23.9 | 0 |
| cisplatin   | F | 65 | Caucasian | SCLC           | III | current | 1 | 0.67 | 98  | 4.5  | 11.5 | 263 | 31.9 | 1 |
| carboplatin | M | 74 | Caucasian | squamous       | IV  | current | 2 | 0.92 | 77  | 5.9  | 12.3 | 321 | 21.6 | 1 |
| carboplatin | F | 64 | Caucasian | adenocarcinoma | IV  | former  | 1 | 0.48 | 101 | 6.2  | 12.7 | 338 | 16.7 | 0 |
| carboplatin | M | 64 | AA        | SCLC           | I   | former  | 2 | 0.77 | 104 | 7.2  | 13.5 | 166 | 25.4 | 0 |
| carboplatin | F | 56 | Caucasian | adenocarcinoma | IV  | current | 1 | 0.57 | 103 | 7.8  | 14.8 | 229 | 31.2 | 1 |
| carboplatin | F | 58 | AA        | SCLC           | IV  | former  | 2 | 1.32 | 44  | 11.2 | 11.3 | 245 | 41.0 | 0 |
| carboplatin | M | 64 | Caucasian | adenocarcinoma | IV  | current | 0 | 0.82 | 91  | 6.4  | 12   | 128 | 22.0 | 0 |
| carboplatin | M | 73 | Caucasian | SCLC           | IV  | former  | 1 | 0.78 | 67  | 6.1  | 10.8 | 175 | 29.6 | 0 |
| cisplatin   | F | 56 | AA        | adenocarcinoma | III | never   | 2 | 0.84 | 76  | 8.4  | 12   | 327 | 22.1 | 0 |
| carboplatin | F | 56 | Caucasian | SCLC           | IV  | current | 2 | 0.72 | 94  | 14.2 | 13.3 | 138 | 33.6 | 0 |
| carboplatin | M | 61 | Caucasian | SCLC           | IV  | current | 2 | 0.69 | 94  | 6.5  | 11.4 | 327 | 24.3 | 0 |
| cisplatin   | M | 61 | Caucasian | SCLC           | IV  | current | 1 | 0.77 | 80  | 16.6 | 9.6  | 323 | 18.4 | 0 |
| cisplatin   | M | 63 | Caucasian | SCLC           | IV  | former  | 2 | 0.74 | 98  | 10.7 | 14.5 | 225 | 35.8 | 0 |
| carboplatin | M | 61 | Caucasian | squamous       | IV  | former  | 1 | 0.75 | 93  | 8.8  | 13.8 | 287 | 25.5 | 0 |
